# Supplementary material
Source: PubMed Central journal article supplement (PMC7334940)
Supplement: mmc1.pdf [file mmc1.pdf]

## Appendix - Patients' questionnaire

This questionnaire is meant for people who were diagnosed with cancer and are currently under treatment or in follow-up for cancer in the hospital. The questionnaire has been translated from Dutch to English.

### Patients' characteristics

1. What situation applies best to you?
  - a. I have cancer and I am awaiting to start treatment (>Q2)
  - b. I am currently under treatment for cancer (>Q2)
  - c. My cancer treatment has been completed and I am currently in follow-up at the hospital (>Q2)
  - d. None of the answers above (>disqualification page)
  
2. What is your gender? (>Q3)
  - a. Male
  - b. Female
  - c. Other
  
3. What is your age? (>Q4)
  - a. Younger than 18 years
  - b. 18 – 40 years
  - c. 40 - 65 years
  - d. 65 – 75 years
  - e. 75 years or older
  
4. Which type of cancer do you have (or did you have)? (dropdown menu including 'other' with an open text field) (>Q5)

*In case you have (had) multiple cancer types, fill in the most recent diagnosis.*

5. Which of the descriptions below matches your current situation the best? (>Q6)
  - a. I am (probably) cured from cancer
  - b. I have (probably) curable disease
  - c. I have (probably) incurable disease
  - d. I don't know

6. Which treatment(s) do you currently have or (would you) soon have? Have you finished your treatment? Fill out 'not applicable'. Multiple answers possible. (>Q7)
- a. Surgery
  - b. Chemotherapy
  - c. Radiation therapy
  - d. Hormonal therapy
  - e. Immunotherapy
  - f. Targeted therapy
  - g. Stem cell transplantation
  - h. Active surveillance / watchful waiting
  - i. Ostomy surgery
  - j. Symptom/pain management
  - k. I don't know which treatment(s)
  - l. Not applicable
  - m. Other (open text field)
7. In which hospital are you currently under treatment or follow-up? Do you visit multiple hospitals? Fill out the hospital that is your first point of contact for your treatment (dropdown menu including 'other' with an open text field). (>Q8)

#### **Contact with the hospital**

8. Did you have contact with the hospital (Q7) about the consequences of the corona crisis for your treatment or follow-up of (Q4)?
- a. Yes (>Q10)
  - b. No (>Q9)
  - c. I don't know/not applicable (>Q17)
9. When is your next appointment or investigation for treatment or follow-up of (Q4) scheduled in (Q7)? (>Q17)
- a. March 2020
  - b. April 2020
  - c. May 2020
  - d. June 2020
  - e. July 2020
  - f. After July 2020
  - g. No appointment or investigation has been scheduled yet
  - h. Not applicable

Open text field for (optional) explanation.

### Impact of the COVID-19 pandemic on consultations, treatment and follow-up

10. Does the corona crisis have consequences for the treatment or follow-up of (Q4) in the (Q7)?
- Yes (>Q12)
  - Not yet (>Q11)
  - No (>Q11)
  - I don't know (>Q11)

### Concerns about COVID-19

11. To which extent are you worried that the corona crisis will have consequences for the treatment or follow-up of (Q4) in the (Q7)? (>Q17)
- I am **not** worried
  - I am a **little** worried
  - I am worried
  - I am **very much** worried

Open text field for explanation (optional)

### Impact of the COVID-19 pandemic on consultations, treatment and follow-up

12. What are the consequences of the corona crisis for the treatment or follow-up of (Q4) in the (Q7)? Multiple answers possible.
- One or more appointments or investigations in the hospital are **cancelled**. (>Q14)
  - One or more appointments or investigations in the hospital are **rescheduled** to another date (>Q14)
  - One or more appointments or investigations are **changed** into a telephonic or digital appointment (i.e. videocalls or chat) (>Q14)
  - Treatment is **adjusted** (>Q13)
  - Treatment is **delayed** (>Q13)
  - Treatment is **cancelled** (>Q13)
  - A second opinion is **delayed** (>Q14)
  - A second opinion is **canceled** (>Q14)
  - I have to take specific precautions (>Q14)
  - Other:

Open text field for explanation (optional)

13. You have answered that your treatment of (Q4) was adjusted, delayed or cancelled as a consequence of the corona crisis. Which treatment(s) does this apply to? (>Q14)

*Multiple answers possible*

|                               | Surgery | Chemotherapy | Radiation therapy | Hormonal therapy | Immunotherapy | Targeted therapy | Stem cell transplantation | Ostomy surgery | Pain/symptom management | I don't know /not applicable |
|-------------------------------|---------|--------------|-------------------|------------------|---------------|------------------|---------------------------|----------------|-------------------------|------------------------------|
| Treatment is <b>adjusted</b>  |         |              |                   |                  |               |                  |                           |                |                         |                              |
| Treatment is <b>delayed</b>   |         |              |                   |                  |               |                  |                           |                |                         |                              |
| Treatment is <b>cancelled</b> |         |              |                   |                  |               |                  |                           |                |                         |                              |

Open text field for explanation (optional).

14. You have answered that the corona crisis has consequences for the treatment or follow-up of (Q4) in the (Q7).

Fill out who took the initiative per consequence. (>Q15)

|                                                                                                                      | Hospital | me / my relatives | My general practitioner | Someone else |
|----------------------------------------------------------------------------------------------------------------------|----------|-------------------|-------------------------|--------------|
| One or more appointments or investigations in the hospital are <b>cancelled</b>                                      |          |                   |                         |              |
| One or more appointments or investigations in the hospital are <b>rescheduled</b> to another date                    |          |                   |                         |              |
| One or more appointments or investigations in the hospital are <b>changed</b> in a telephonic or digital appointment |          |                   |                         |              |
| Treatment is <b>adjusted</b>                                                                                         |          |                   |                         |              |
| Treatment is <b>delayed</b>                                                                                          |          |                   |                         |              |
| Treatment is <b>cancelled</b>                                                                                        |          |                   |                         |              |
| Second opinion is <b>delayed</b>                                                                                     |          |                   |                         |              |
| Second opinion is <b>cancelled</b>                                                                                   |          |                   |                         |              |
| I have to take specific precautions                                                                                  |          |                   |                         |              |

Open text field for explanation (optional)

15. You have answered that the corona crisis has consequences for the treatment or follow-up of (Q4) in the (Q7).

Fill out per consequence if the given information was clear. (>Q16)

|                                                                                                                      | <b>Clear</b> | <b>Somewhat clear</b> | <b>Unclear</b> | <b>I did not receive any information</b> | <b>I don't know/ not applicable</b> |
|----------------------------------------------------------------------------------------------------------------------|--------------|-----------------------|----------------|------------------------------------------|-------------------------------------|
| One or more appointments or investigations in the hospital are <b>cancelled</b>                                      |              |                       |                |                                          |                                     |
| One or more appointments or investigations in the hospital are <b>rescheduled</b> to another date                    |              |                       |                |                                          |                                     |
| One or more appointments or investigations in the hospital are <b>changed</b> in a telephonic or digital appointment |              |                       |                |                                          |                                     |
| Treatment is <b>adjusted</b>                                                                                         |              |                       |                |                                          |                                     |
| Treatment is <b>delayed</b>                                                                                          |              |                       |                |                                          |                                     |
| Treatment is <b>canceled</b>                                                                                         |              |                       |                |                                          |                                     |
| Second opinion is <b>delayed</b>                                                                                     |              |                       |                |                                          |                                     |
| Second opinion is <b>cancelled</b>                                                                                   |              |                       |                |                                          |                                     |
| I have to take specific precautions                                                                                  |              |                       |                |                                          |                                     |

Open text field for explanation (optional)

**Concerns about COVID-19**

16. You have answered that the corona crisis has consequences for the treatment or follow-up of (Q4) in the (Q7).

Fill out per consequence the extent to which you are worried about it. (>Q17)

|                                                                                                                      | I am not worried | I am a little worried | I am worried | I am very much worried |
|----------------------------------------------------------------------------------------------------------------------|------------------|-----------------------|--------------|------------------------|
| one or more appointments or investigations in the hospital are <b>cancelled</b>                                      |                  |                       |              |                        |
| One or more appointments or investigations in the hospital are <b>rescheduled</b> to another date                    |                  |                       |              |                        |
| One or more appointments or investigations in the hospital are <b>changed</b> in a telephonic or digital appointment |                  |                       |              |                        |
| Treatment is <b>adjusted</b>                                                                                         |                  |                       |              |                        |
| Treatment is <b>delayed</b>                                                                                          |                  |                       |              |                        |
| Treatment is <b>canceled</b>                                                                                         |                  |                       |              |                        |
| A second option is <b>delayed</b>                                                                                    |                  |                       |              |                        |
| A second opinion is <b>cancelled</b>                                                                                 |                  |                       |              |                        |
| I have to take certain precautionary measurements                                                                    |                  |                       |              |                        |

Open text field for explanation (optional)

**Impact of the COVID-19 pandemic on consultations, treatment and follow-up**

17. Sometimes you want to get in touch with your doctor or nurse, for example when you have physical complaints, questions or concerns.

Does the corona crisis influence how frequently you contact the hospital (Q7) about your diagnosis (Q4)? (>Q18)

- a. Yes, as a consequence of the corona crisis I contact the hospital **less frequently** than I would normally do
- b. Yes, as a consequence of the corona crisis I contact the hospital **more frequently** than I would normally do
- c. No, nothing has changed, I contact the hospital as frequently as I would normally do
- d. No, I never contact the hospital myself

Open text field for explanation (optional)

## Patients' characteristics

18. Did you – as far as you are aware of- have (had) the corona virus?
- Yes, I have been **tested** and the test result was **positive** (>Q20)
  - Possibly, I have/had airway complaints and/or fever ( $\geq 38$  degrees Celsius) and/or two or more symptoms of: flu(-like symptoms) or malaise, muscle soreness, headache, pain in the eye, and/or have been in contact with someone who is/was infected with the corona virus (>Q19)
  - No, I have been **tested** and the test result was **negative**. (>Q19)
  - No, I have **not been tested** and I **did not have** any flu-like symptoms (>Q19)
19. Everyone can get infected with the corona virus. To which extent are you worried to get infected with the corona virus? (>Q20)
- I am **not** worried
  - I am **a little** worried
  - I am worried
  - I am **very much** worried
- Open text field for explanation (optional)
20. The national guidelines and measures of government and hospitals are continuously being changed. It is therefore important to now when you filled in this questionnaire. In which week did you fill in the questionnaire?
- In the week of march 28<sup>th</sup> until April 3<sup>rd</sup>
  - In the week of April 4<sup>th</sup> until April 10<sup>th</sup>
  - In the week of April 11<sup>th</sup> until April 17<sup>th</sup>
  - In the week of April 18<sup>th</sup> until April 24<sup>th</sup>

*End of survey*
